# Supplementary material for: Correlation and Difference between Core Micro-Organisms and Volatile Compounds of Suan Rou from Six Regions of China
Source: MDPI journal article supplement (doi:10.3390/foods11172708), 2022-09-05
Supplement: s1 [file s1]

# Supplementary Materials

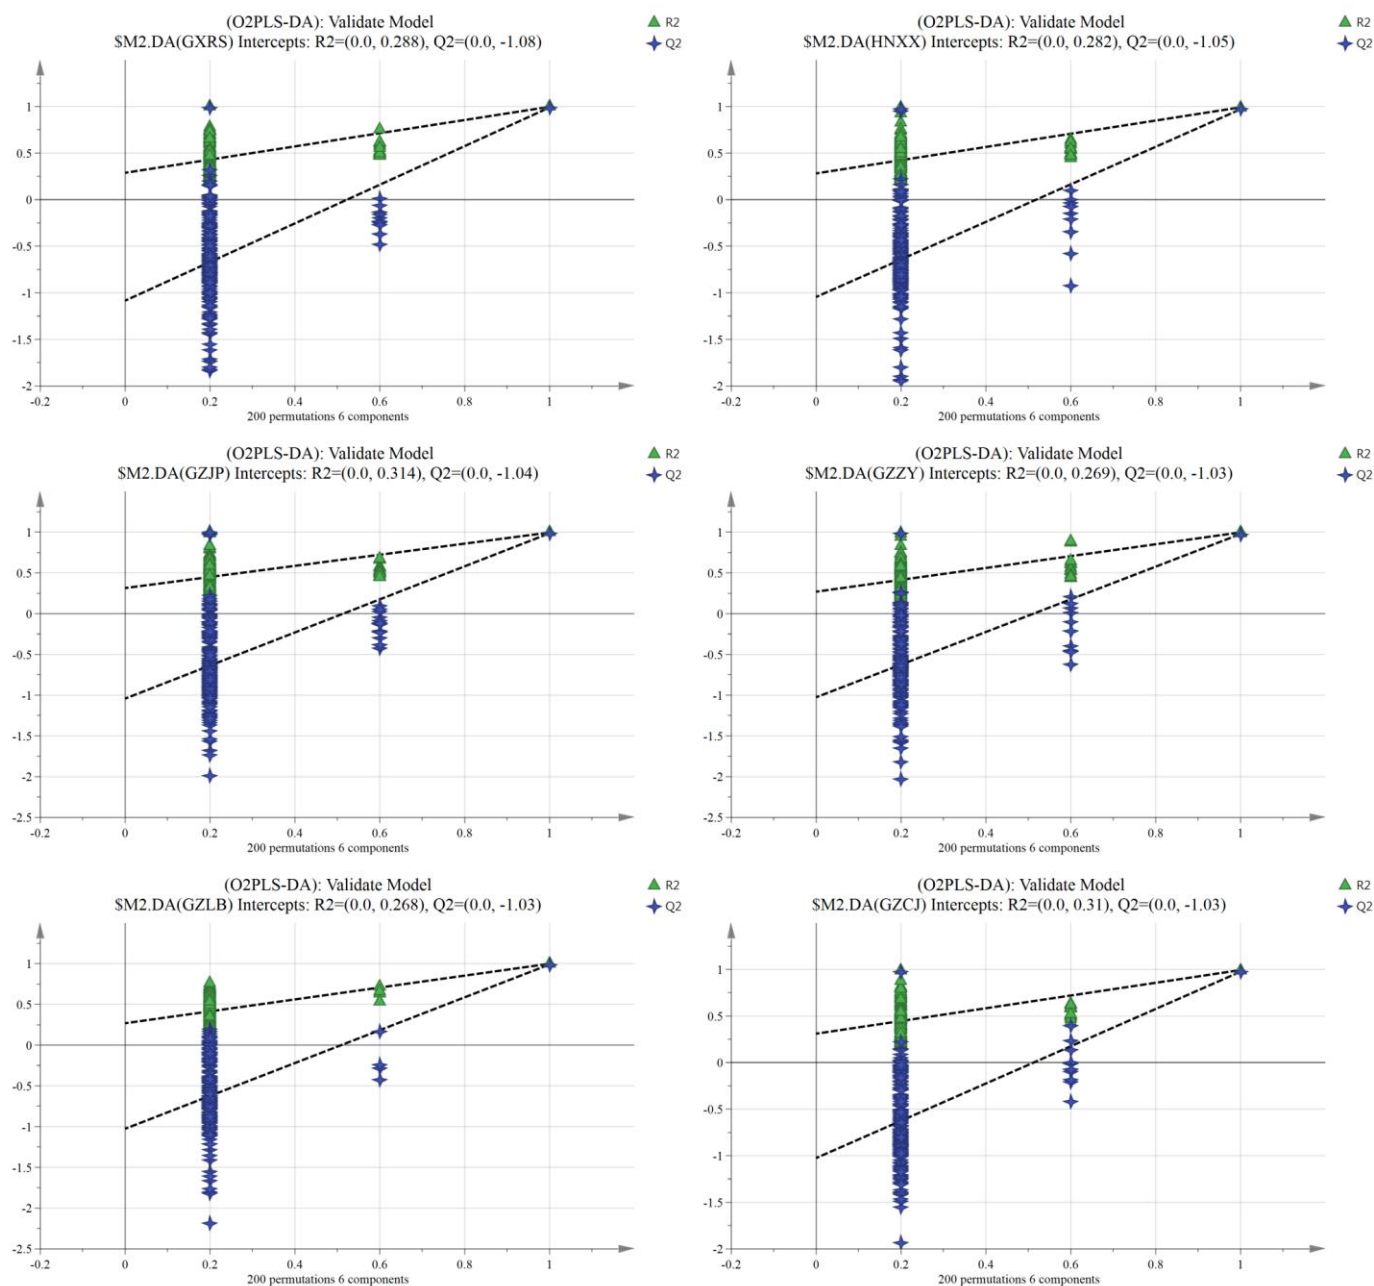

Figure S1. The Permutations Plot for O2PLS-DA. The triangle represents  $R^2$ , the four-pointed star represents  $Q^2$ , and the dotted line represents their respective regression lines.
